# Supplementary material for: Overexpression of PLXDC2 in Stromal Cell-Associated M2 Macrophages Is Related to EMT and the Progression of Gastric Cancer
Source: PubMed Central journal article supplement (PMC8194078; doi:10.3389/fcell.2021.673295), 2021-05-28
Supplement: Data_Sheet_1.pdf [file Data_Sheet_1.pdf]

# Overexpression of PLXDC2 in Stromal Cell-Associated M2 Macrophages is Related to EMT and the Progression of Gastric Cancer

## SUPPLEMENTARY MATERIALS

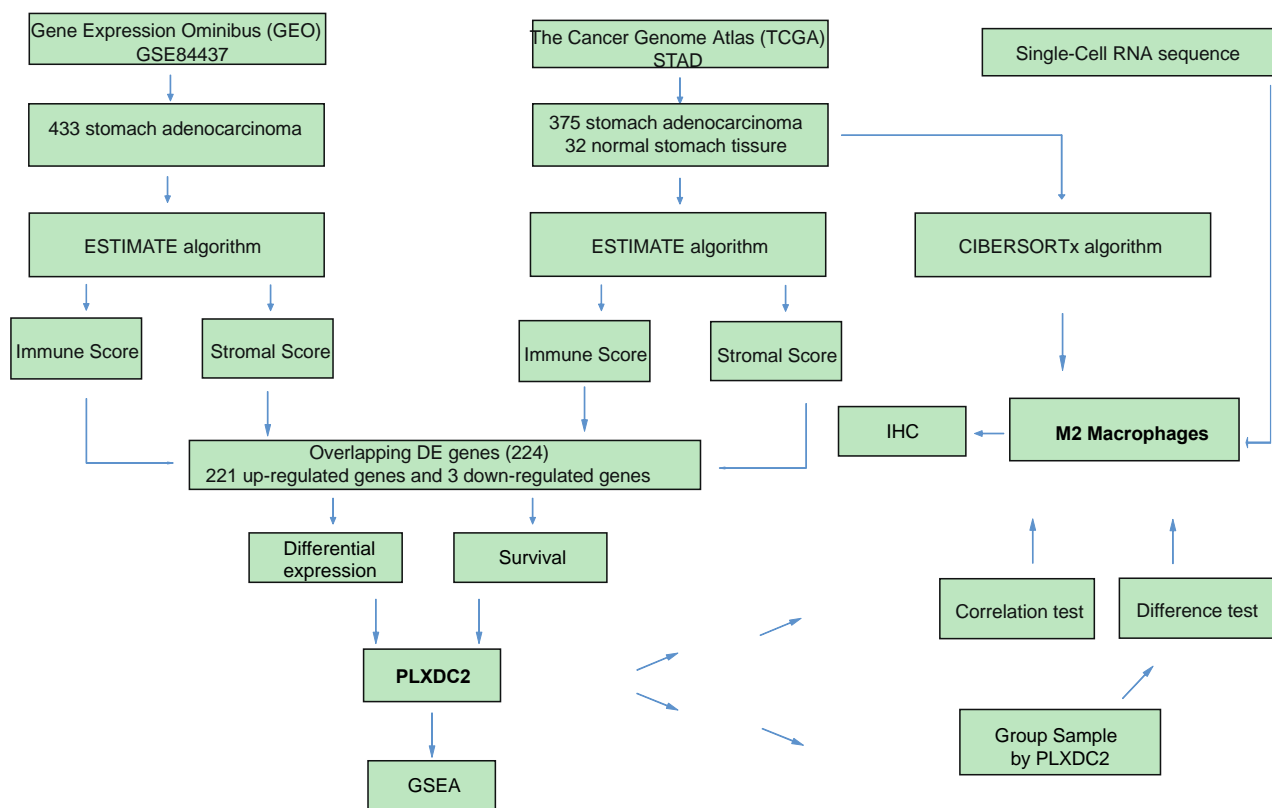

Figure S1

Figure S1: Workflow of this study.

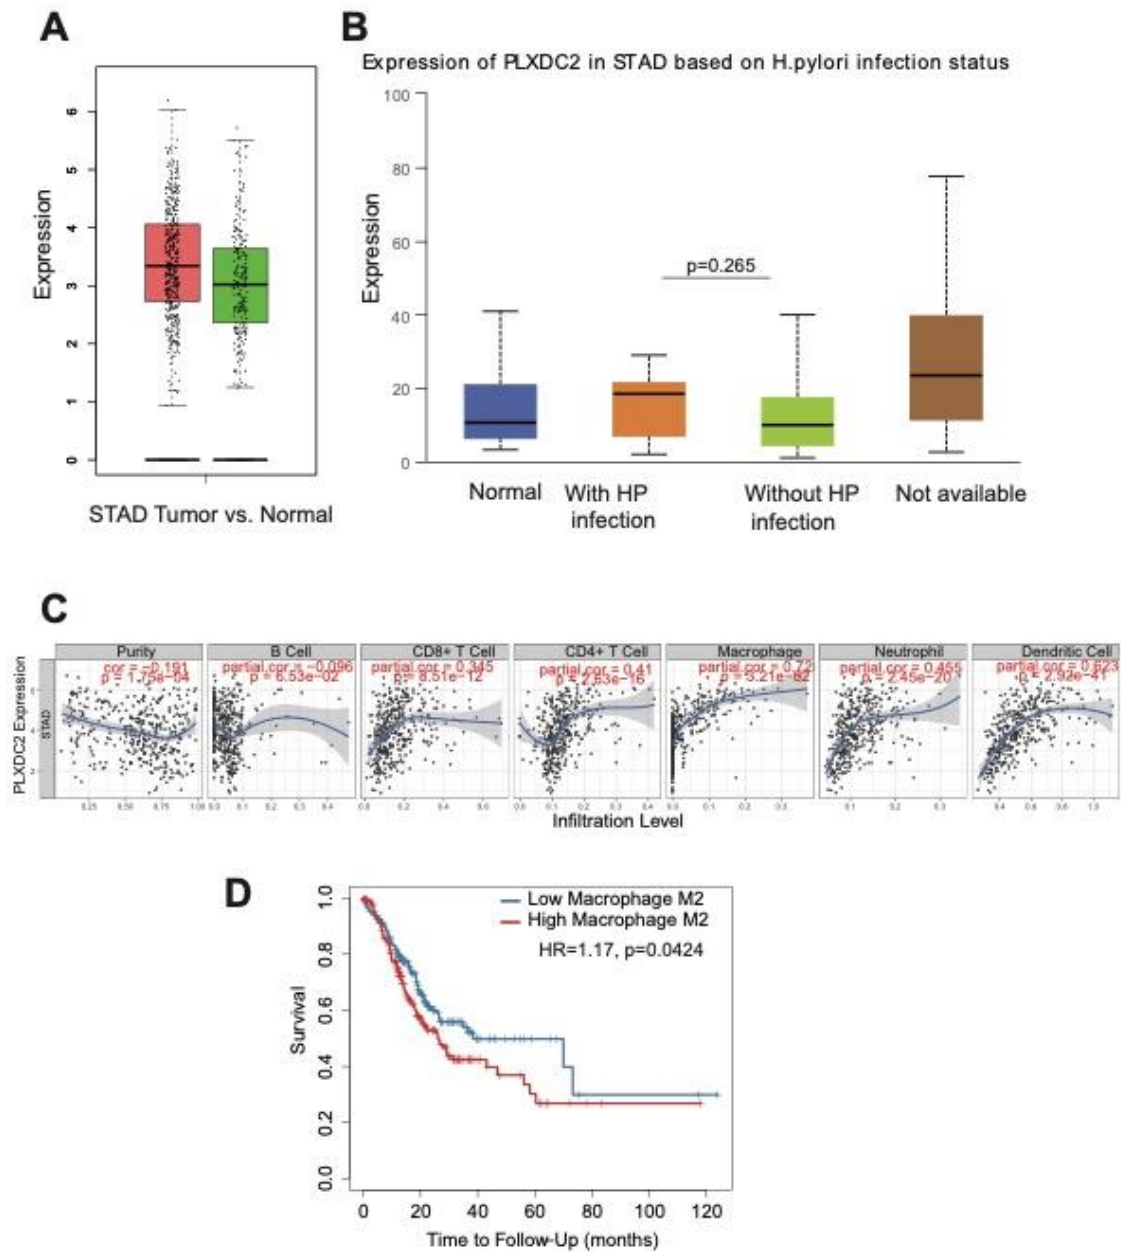

**Figure S2**

Figure S2: (A) Comparison of PLXDC1 expression between tumor and normal samples. (B) Comparison of PLXDC2 expression between samples with and without HP. Infection. (C) Correlation scatter plot of PLXDC2 and 6 general immune cell types. (D) Survival KM plot of M2 Macrophage,  $p=0.0424$  by log-rank test.

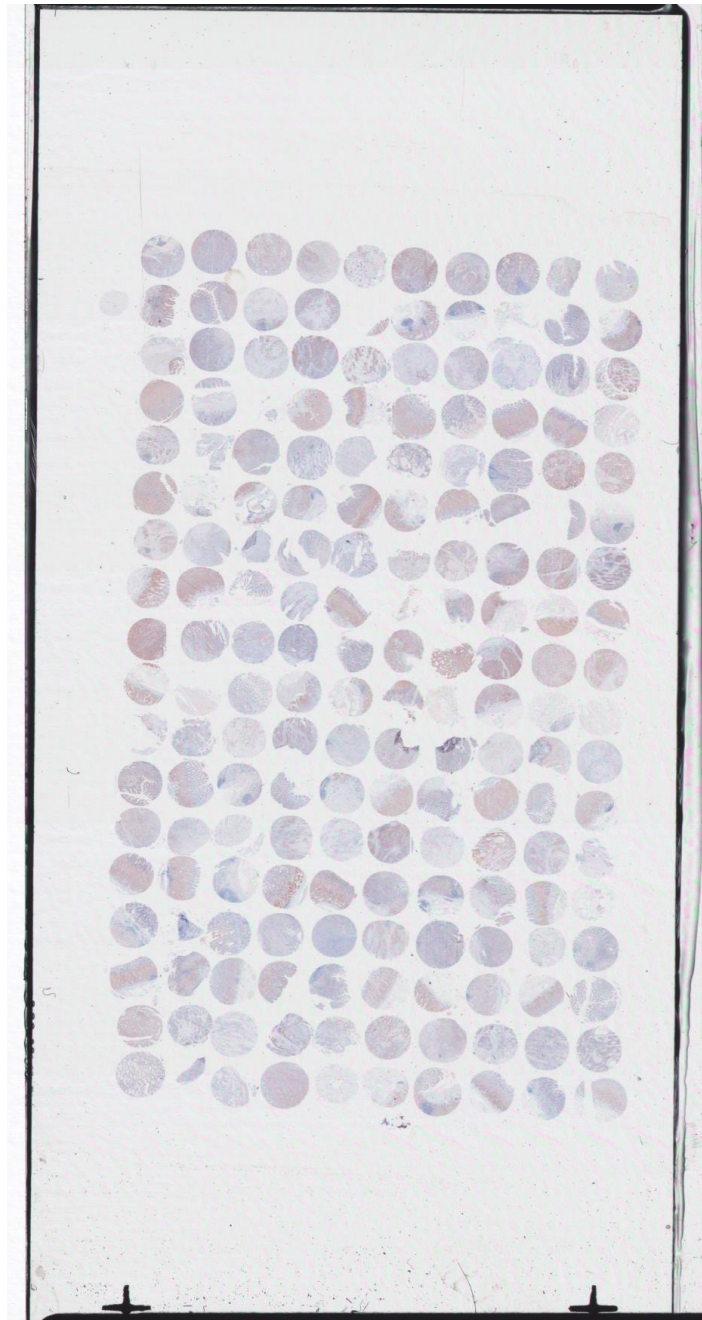

**Figure S3**

Figure S3: The whole slide photo of the TMA.

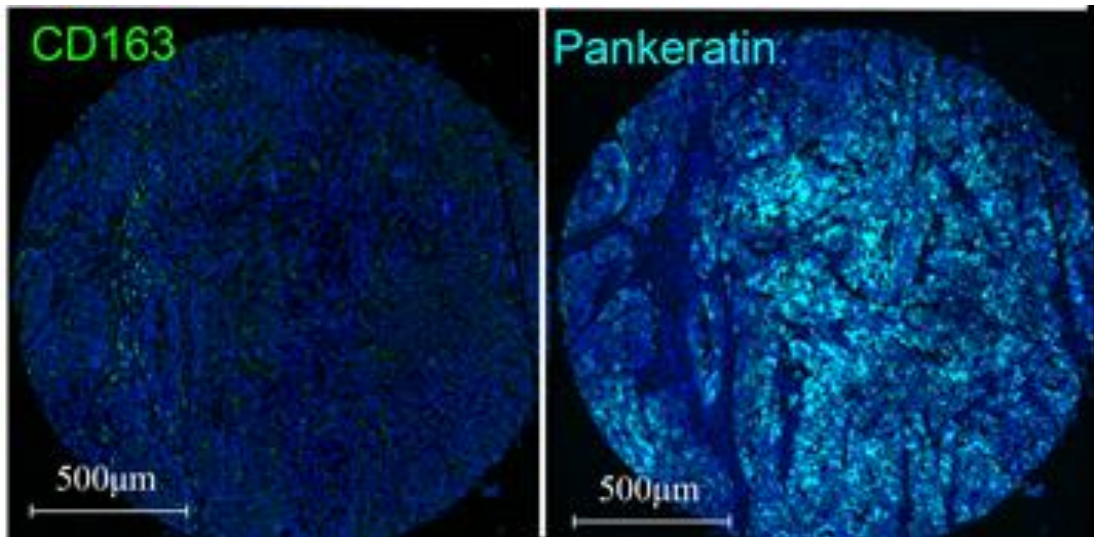

**Figure S4**

Figure S4: The slide photo of the TMA, displaying CD163 and Pankeratin staining.
